# Supplementary material for: Flash drought onset over the Contiguous United States: Sensitivity of inventories and trends to quantitative definitions
Source: Copernicus journal article supplement (doi:10.5194/hess-2020-385), 2020-08-19
Supplement: Supplementary file 1 [file hess-2020-385-supplement.pdf]

Supplementary Figures:

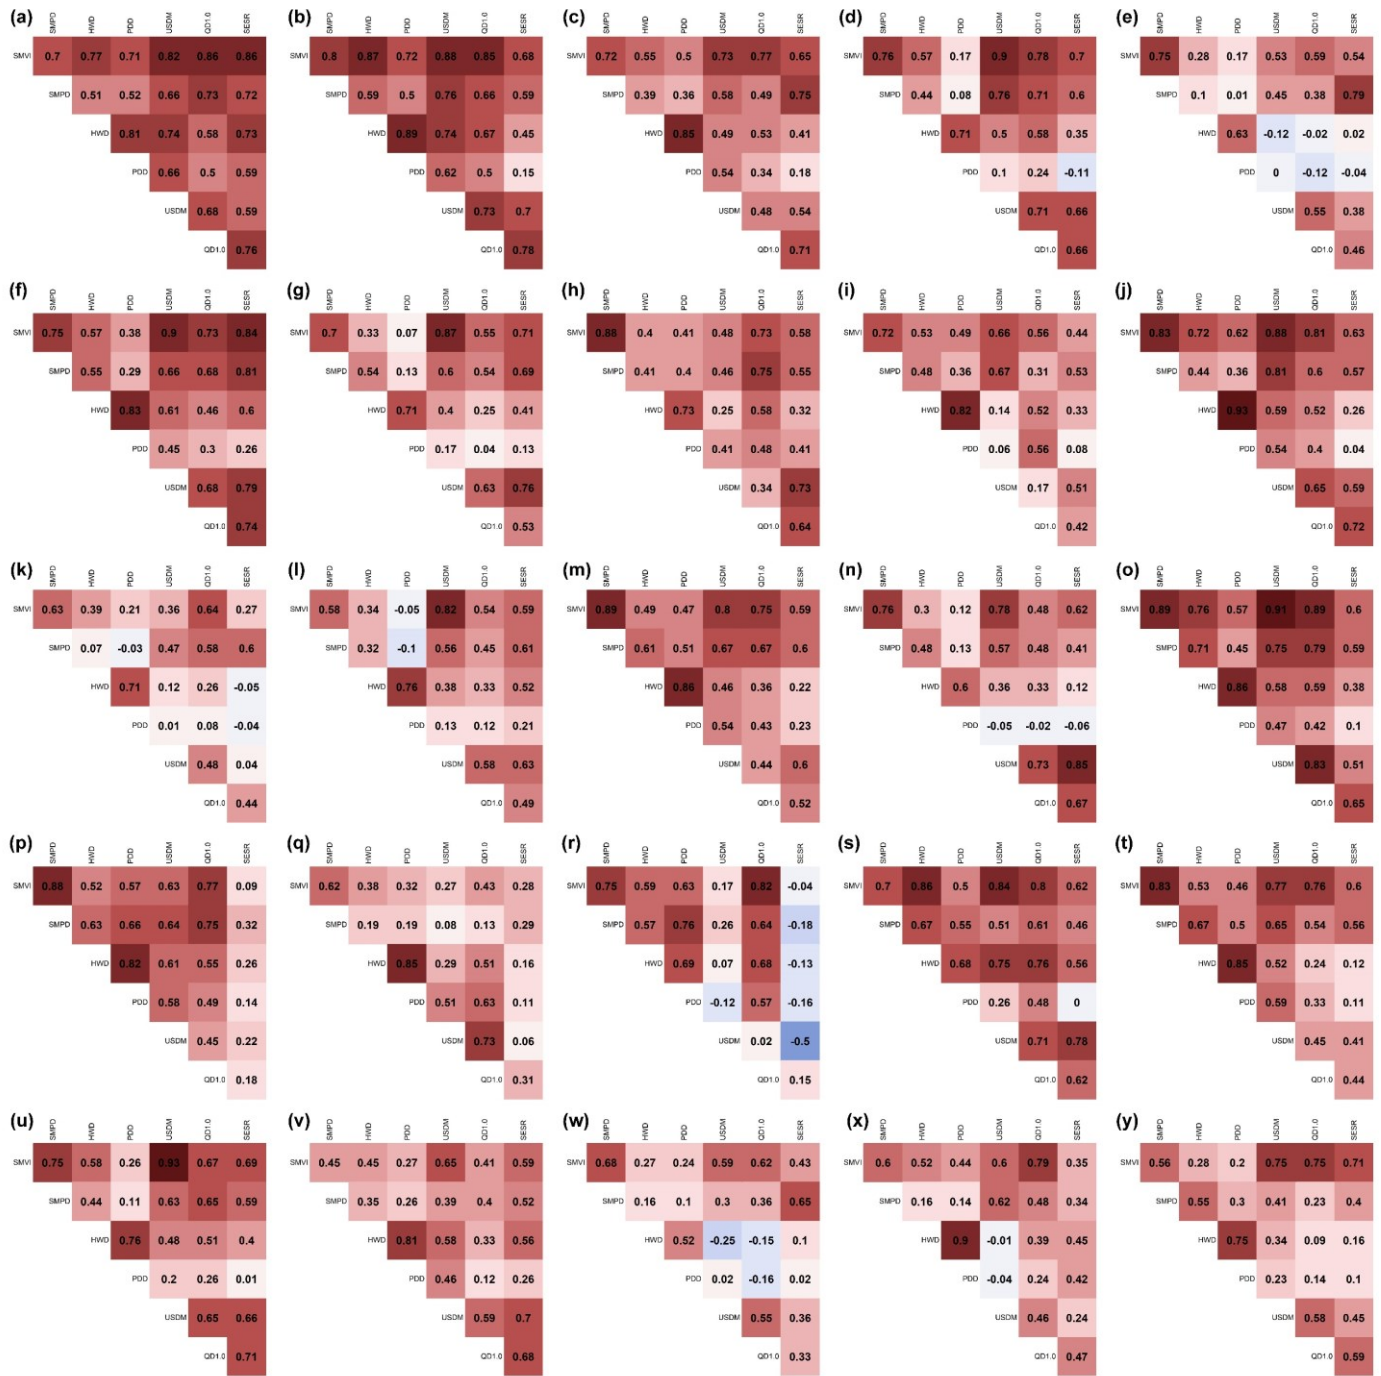

Figure S1: Correlation matrices for all Bukovsky regions from (a) to (y): Appalachia, Central, CPlains, DeepSouth, Desert, East, EastCoast, GreatBasin, GreatLakes, GreatPlains, Mezquital, MidAtlantic, MtWest, NorthAtlantic, NPlains, NRockies, PacificNW, PacificSW, Prairie, Rockies, South, Southeast, Southwest, SPlains, SRockies.
